# Supplementary material
Source: PubMed Central journal article supplement (PMC3986152)
Supplement: 1312717110_pnas.201312717SI.pdf [file 1312717110_pnas.201312717SI.pdf]

# Supporting Information

Morikawa et al. 10.1073/pnas.1312717110

## SI Materials and Methods

**Processing of Cab Analysis of Gene Expression Data.** Regions with differential levels of transcription initiation were defined based on a method described by Audic and Claverie (1). In brief, the probability of observing  $y$  mapped cab analysis of gene expression (CAGE) reads in a certain TSS region in sample 1; given  $x$ , the number of mapped reads in sample 2 is given by

$$p(y|x) = \binom{N_2}{N_1}^y \frac{(x+y)!}{x!y! \left(1 + \frac{N_2}{N_1}\right)^{(x+y+1)},} \quad [\text{S1}]$$

where  $N_1$  and  $N_2$  represent the total numbers of mapped CAGE tags in samples 1 and 2, respectively. A  $P$  value for differential transcription initiation in the TSS region was calculated from the cumulative distribution of these probabilities:

$$p(y|x) = \sum_{i=y}^{\infty} p(i|x) = 1 - \sum_{i=0}^{y-1} p(i|x). \quad [\text{S2}]$$

Finally, a correction for multiple testing was done by multiplying  $p(y|x)$  by the number of tests (61,949; e.g., the number of TSS clusters containing at least one mapped read in the samples of interest). The threshold  $P$  value for significant differential transcription initiation was set to 0.01 (after correction for multiple testing).

**Regulatory Motif Overrepresentation Analysis.** A set of 543 position weight matrices (PWMs) was prepared from the Jaspar database (2), including binding preferences for human, mouse, and rat transcription factors as well as core promoter motifs. For each PWM, a threshold score was set in a way that resulted in about one predicted site per PWM per 5 kb.

For additional analysis, we made a distinction between the enrichment of regulatory motifs in (i) a set of promoters relative to the genomic set of promoters, (ii) a set of promoters relative to another set of promoters, and (iii) a set of regions relative to the genome-wide tendencies.

**1. Overrepresentation index analysis of a set of promoters relative to the genomic set of promoters.** Transcription start sites (TSSs) of CAGE data were decided in FANTOM5 (Functional Annotation of the Mammalian Genome 5) as robust peaks (version mm9 of the mouse genome was used), and promoter regions were defined as 500 bp upstream of summits of the TSS clusters. For a given set of promoter sequences  $S$  for each PWM motif, the overrepresentation index (ORI) was calculated as follows (3):

$$\text{ORI}_S = \frac{\text{Density}_S}{\text{Density}_G} \times \frac{\text{Proportion}_S}{\text{Proportion}_G}, \quad [\text{S3}]$$

where  $\text{Density}_S$  and  $\text{Density}_G$  represent the average number of predicted transcription factor binding sites (TFBSs) per sequence for the PWM of interest in the set of promoters  $S$  and the genome-wide set of promoters  $G$ , respectively, and  $\text{Proportion}_S$

and  $\text{Proportion}_G$  represent the proportion of sequences containing at least one predicted TFBS for the PWM of interest in the set of promoters  $S$  and the genome-wide set of promoters  $G$ , respectively.

The significance of each  $\text{ORI}_S$  value was evaluated using a random sampling approach, where from the genome-wide set of promoters, a set of promoters was randomly sampled and an  $\text{ORI}_{\text{Sampled}}$  was calculated. To limit the influence of guanine cytosine content biases, this sampling was done in a way that the sampled set contains the same number of sequences that are annotated to be associated with cytosine-phosphodiester-guanine (CpG) islands as the original set  $S$ . Sampling was done 1 million times, and the  $P$  values of  $\text{ORI}_S$  were defined as the ratio of  $\text{ORI}_{\text{Sampled}}$  values being equal to or higher than  $\text{ORI}_S$ .

**2. ORI analysis of a set of promoters relative to another set of promoters.** The approach is basically identical to the one using the genome-wide set of promoters as reference, except that now  $\text{ORI}_S$  is defined as

$$\text{ORI}_S = \frac{\text{Density}_S}{\text{Density}_{S'}} \times \frac{\text{Proportion}_S}{\text{Proportion}_{S'}}, \quad [\text{S4}]$$

where  $S'$  is a second set of promoters, different from the genome-wide set, used as reference. Here, a random sampling approach is also used for estimating the significance of  $\text{ORI}_S$ . Two sets of sequences are sampled: one corresponding to  $S$  and one corresponding to  $S'$ . From the predicted TFBSs in both sets,  $\text{ORI}_{\text{Sampled}}$  is calculated. Importantly, the randomly sampled sets contain the same number of sequences associated with CpG islands as in  $S$  and  $S'$ , respectively. Sampling was done 10,000 times, and the  $P$  value of  $\text{ORI}_S$  was defined as described above.

**3. ORI analysis a set of regions relative to the genome-wide tendencies.** In this case, predicted TFBSs in the regions from position  $-500$  to  $+500$  relative to the summit of the mapped read peak representing differentially demethylated regions or forkhead box P3 (Foxp3)-bound regions were used. We observed that, in practice, these regions had specific GC content profiles that were hard to account for using random sampling approaches. Instead, we used the genome-wide tendencies of each motif to construct a large reference set of artificial sequences with the same GC content profile as the input set of sequences. The  $\text{ORI}_S$  was defined the same as in Eq. S3, where  $G'$  represents the large set of artificial sequences. The significance of  $\text{ORI}_S$  was estimated as described above by randomly sampling from  $G'$ .

In 20 sets of promoter sequences of genes with differential expression between regulatory T (Treg) and conventional T (Tconv) cells and between nonstimulated and stimulated Tconv and Treg cells,  $\text{ORI}_S$  values and corresponding  $P$  values were calculated for all 543 PWMs. A subset of 117 PWMs that had  $\text{ORI}_S > 2$  and  $P$  value  $< 0.001$  in at least 1 of 20 sets of promoters was picked up for the construction of a heat map (Fig. S4A). The heat map was constructed by hierarchical clustering using the pairwise Pearson correlation coefficient of  $\log(\text{ORI})$  values as a measure of similarity between pairs of PWMs (rows); 20 sets of promoters were clustered in the same way (columns). Color intensities in the heat map reflect ORI values.

1. Audic S, Claverie JM (1997) The significance of digital gene expression profiles. *Genome Res* 7(10):986–995.  
2. Bryne JC, et al. (2008) JASPAR, the open access database of transcription factor-binding profiles: New content and tools in the 2008 update. *Nucleic Acids Res* 36(Database issue):D102–D106.

3. Bajic VB, Choudhary V, Hock CK (2004) Content analysis of the core promoter region of human genes. *In Silico Biol* 4(2):109–125.





**A. Motifs enriched in up-regulated TSS clusters in Treg**

| Motif Name | Family                    | ORI    | ORI_p                  |
|------------|---------------------------|--------|------------------------|
| Hif1       | Helix-Loop-Helix          | 4.6342 | <1.00x10 <sup>-6</sup> |
| Sp100      | Sand                      | 4.4966 | <1.00x10 <sup>-6</sup> |
| Myc        | Helix-Loop-Helix          | 4.0624 | <1.00x10 <sup>-6</sup> |
| Mycn       | Helix-Loop-Helix          | 3.7038 | 5.00x10 <sup>-6</sup>  |
| Max        | Helix-Loop-Helix          | 3.5703 | 1.30x10 <sup>-5</sup>  |
| E2f3       | E2F                       | 3.4867 | 3.70x10 <sup>-5</sup>  |
| Usf1       | Helix-Loop-Helix          | 3.4627 | 2.31x10 <sup>-4</sup>  |
| Nfya       | NFY CCAAT-binding         | 3.3123 | 2.20x10 <sup>-5</sup>  |
| Myc        | Helix-Loop-Helix          | 3.2370 | 6.40x10 <sup>-5</sup>  |
| Jundm2     | Leucine Zipper            | 3.0566 | 1.11x10 <sup>-4</sup>  |
| TATA-Box   |                           | 2.8941 | 1.00x10 <sup>-6</sup>  |
| Tbp        | TATA-binding              | 2.8941 | 2.00x10 <sup>-6</sup>  |
| Creb1      | Leucine Zipper            | 2.7743 | 4.31x10 <sup>-4</sup>  |
| Hdx        | Homeo                     | 2.6729 | 3.00x10 <sup>-6</sup>  |
| Homez      | Homeo                     | 2.6189 | 9.70x10 <sup>-5</sup>  |
| Gfi        | BetaBetaAlpha-zinc finger | 2.5683 | 1.61x10 <sup>-4</sup>  |
| Rel        | Rel                       | 2.4711 | 1.70x10 <sup>-4</sup>  |
| Atf1       | Leucine Zipper            | 2.2991 | 7.17x10 <sup>-4</sup>  |

**B. Motifs enriched in down-regulated TSS clusters in Treg**

| Motif Name | Family            | ORI    | ORI_p                  |
|------------|-------------------|--------|------------------------|
| GABPA      | Ets               | 3.0733 | <1.00x10 <sup>-6</sup> |
| SFPI1      | Ets               | 2.8290 | <1.00x10 <sup>-6</sup> |
| FEV        | Ets               | 2.8101 | <1.00x10 <sup>-6</sup> |
| ELK4       | Ets               | 2.5927 | <1.00x10 <sup>-6</sup> |
| EHF        | Ets               | 2.5850 | <1.00x10 <sup>-6</sup> |
| EF5        | Ets               | 2.5232 | <1.00x10 <sup>-6</sup> |
| SP1        | Ets               | 2.4644 | <1.00x10 <sup>-6</sup> |
| ELF3       | Ets               | 2.4053 | <1.00x10 <sup>-6</sup> |
| ETS1       | Ets               | 2.2357 | <1.00x10 <sup>-6</sup> |
| IRF1       | lrf               | 2.1957 | <1.00x10 <sup>-6</sup> |
| ISGF3G     | lrf               | 2.1738 | <1.00x10 <sup>-6</sup> |
| IRF4       | lrf               | 2.1488 | <1.00x10 <sup>-6</sup> |
| SPDEF      | Ets               | 2.1326 | <1.00x10 <sup>-6</sup> |
| NFYA       | NFY CCAAT-binding | 2.1108 | <1.00x10 <sup>-6</sup> |
| ELK1       | Ets               | 2.0026 | <1.00x10 <sup>-6</sup> |

**C. Motifs enriched in up-regulated TSS clusters in Tconv**

| Motif Name | Family                    | ORI    | ORI_p                  |
|------------|---------------------------|--------|------------------------|
| SP1        | Ets                       | 5.4988 | <1.00x10 <sup>-6</sup> |
| MYC        | Helix-Loop-Helix          | 4.8777 | <1.00x10 <sup>-6</sup> |
| USF1       | Helix-Loop-Helix          | 4.8764 | <1.00x10 <sup>-6</sup> |
| MAX        | Helix-Loop-Helix          | 4.5491 | <1.00x10 <sup>-6</sup> |
| MYCN       | Helix-Loop-Helix          | 4.5263 | <1.00x10 <sup>-6</sup> |
| ELK4       | Ets                       | 4.4094 | <1.00x10 <sup>-6</sup> |
| HIF1A      | Helix-Loop-Helix          | 4.3317 | <1.00x10 <sup>-6</sup> |
| BHLHB2     | Helix-Loop-Helix          | 4.2156 | <1.00x10 <sup>-6</sup> |
| ETS1       | Ets                       | 4.2125 | <1.00x10 <sup>-6</sup> |
| GABPA      | Ets                       | 4.0577 | <1.00x10 <sup>-6</sup> |
| Arnt       | Helix-Loop-Helix          | 3.8073 | <1.00x10 <sup>-6</sup> |
| ELK1       | Ets                       | 3.8061 | <1.00x10 <sup>-6</sup> |
| EHF        | Ets                       | 3.6765 | <1.00x10 <sup>-6</sup> |
| SP100      | Sand                      | 3.5380 | <9.40x10 <sup>-5</sup> |
| MIZF       | BetaBetaAlpha-zinc finger | 3.4071 | <1.00x10 <sup>-6</sup> |
| SP4        | BetaBetaAlpha-zinc finger | 3.1651 | <1.00x10 <sup>-6</sup> |
| SPDEF      | Ets                       | 3.1161 | <1.00x10 <sup>-6</sup> |
| CREB1      | Leucine Zipper            | 2.8884 | 1.00x10 <sup>-6</sup>  |
| NFYA       | NFY CCAAT-binding         | 2.7775 | <1.00x10 <sup>-6</sup> |
| FEV        | Ets                       | 2.7112 | <1.00x10 <sup>-6</sup> |
| PAX2       | Homeo                     | 2.5710 | 1.00x10 <sup>-5</sup>  |
| TBP        | TATA-binding              | 2.4549 | <1.00x10 <sup>-6</sup> |
| JUNDM2     | Leucine Zipper            | 2.4257 | <1.00x10 <sup>-6</sup> |
| CREB1      | Leucine Zipper            | 2.4148 | <1.00x10 <sup>-6</sup> |
| ATF1       | Leucine Zipper            | 2.4075 | <1.00x10 <sup>-6</sup> |
| ELF3       | Ets                       | 2.2986 | <1.00x10 <sup>-6</sup> |
| REL        | Rel                       | 2.2442 | <1.00x10 <sup>-6</sup> |
| SFPI1      | Ets                       | 2.1354 | <1.00x10 <sup>-6</sup> |
| LHX8       | Homeo                     | 2.0894 | 1.61x10 <sup>-4</sup>  |

**D. Motifs enriched in down-regulated TSS clusters in Tconv**

| Motif Name | Family                    | ORI    | ORI_p                  |
|------------|---------------------------|--------|------------------------|
| ASCL2      | Helix-Loop-Helix          | 2.2853 | <1.00x10 <sup>-6</sup> |
| BCL6B      | BetaBetaAlpha-zinc finger | 2.2315 | <1.00x10 <sup>-6</sup> |
| BREU       |                           | 2.2047 | 1.00x10 <sup>-6</sup>  |
| E2F2       | e2f                       | 2.2406 | 3.00x10 <sup>-6</sup>  |
| EGR1       | BetaBetaAlpha-zinc finger | 2.1327 | <1.00x10 <sup>-6</sup> |
| EHF        | Ets                       | 2.2845 | <1.00x10 <sup>-6</sup> |
| ELF5       | Ets                       | 2.2192 | <1.00x10 <sup>-6</sup> |
| ELK4       | Ets                       | 2.0542 | <1.00x10 <sup>-6</sup> |
| FEV        | Ets                       | 2.4013 | <1.00x10 <sup>-6</sup> |
| GABPA      | Ets                       | 2.6024 | <1.00x10 <sup>-6</sup> |
| GATA6      | Gata                      | 2.1742 | 8.80x10 <sup>-5</sup>  |
| GC-BOX     |                           | 2.4041 | <1.00x10 <sup>-6</sup> |
| GMEB1      | Sand                      | 2.0807 | 1.53x10 <sup>-4</sup>  |
| IRF1       | lrf                       | 2.3999 | <1.00x10 <sup>-6</sup> |
| IRF4       | lrf                       | 2.2019 | <1.00x10 <sup>-6</sup> |
| ISGF3G     | lrf                       | 2.1019 | <1.00x10 <sup>-6</sup> |
| KLF4       | BetaBetaAlpha-zinc finger | 2.2461 | <1.00x10 <sup>-6</sup> |
| KLF7       | BetaBetaAlpha-zinc finger | 2.3037 | <1.00x10 <sup>-6</sup> |
| MED-1      |                           | 2.1549 | 4.40x10 <sup>-4</sup>  |
| MTE        |                           | 2.0875 | 4.00x10 <sup>-6</sup>  |
| NFYA       | NFY CCAAT-binding         | 2.2319 | <1.00x10 <sup>-6</sup> |
| SFPI1      | Ets                       | 2.1785 | <1.00x10 <sup>-6</sup> |
| SMAD3      | Mh1                       | 2.2806 | <1.00x10 <sup>-6</sup> |
| SP1        | BetaBetaAlpha-zinc finger | 2.3166 | <1.00x10 <sup>-6</sup> |
| SP100      | Sand                      | 2.1324 | 1.00x10 <sup>-6</sup>  |
| SP4        | BetaBetaAlpha-zinc finger | 2.2822 | <1.00x10 <sup>-6</sup> |
| STAT1      | Stat                      | 2.1438 | <1.00x10 <sup>-6</sup> |
| XCPE1      |                           | 2.1040 | <1.00x10 <sup>-6</sup> |
| ZFP161     | BetaBetaAlpha-zinc finger | 2.0797 | 8.19x10 <sup>-4</sup>  |
| ZFP410     | BetaBetaAlpha-zinc finger | 2.3446 | <1.00x10 <sup>-6</sup> |

**Fig. S3.** Overrepresented regulatory motifs in promoters of TSS clusters regulated by TCR stimulation. Shown are significantly overrepresented regulatory motifs in promoter regions of TSS clusters that were regulated by TCR stimulation. Enriched transcription factor binding motifs, their ORI scores, and *P* values are shown. Motifs found in promoters of TSS clusters (A) up- or (B) down-regulated after TCR stimulation in Treg cells. Motifs found in promoters of TSS clusters (C) up- or (D) down-regulated after TCR stimulation in Tconv cells.













## A. Cage samples

| Samples                                                                                     | Background | Total uniquely mapped tag count |
|---------------------------------------------------------------------------------------------|------------|---------------------------------|
| CD4 <sup>+</sup> CD25 <sup>+</sup> Treg                                                     | C57BL/6    | 3,644,175                       |
| CD4 <sup>+</sup> CD25 <sup>+</sup> Treg with αCD3/28 stimulation                            | C57BL/6    | 3,565,379                       |
| CD4 <sup>+</sup> CD25 <sup>+</sup> Treg with PMA/Ionomycin stimulation                      | C57BL/6    | 1,492,441                       |
| CD4 <sup>+</sup> CD25 <sup>+</sup> CD44 <sup>low</sup> Tconv                                | C57BL/6    | 4,434,387                       |
| CD4 <sup>+</sup> CD25 <sup>+</sup> CD44 <sup>low</sup> Tconv with αCD3/28 stimulation       | C57BL/6    | 3,985,267                       |
| CD4 <sup>+</sup> CD25 <sup>+</sup> CD44 <sup>low</sup> Tconv with PMA/Ionomycin stimulation | C57BL/6    | 7,852,126                       |
| CD4 <sup>+</sup> CD25 <sup>+</sup> Treg                                                     | BALB/c     | 6,217,721                       |
| CD4 <sup>+</sup> CD25 <sup>+</sup> Treg with αCD3/28 stimulation                            | BALB/c     | 3,041,346                       |
| CD4 <sup>+</sup> CD25 <sup>+</sup> Treg with PMA/Ionomycin stimulation                      | BALB/c     | 3,660,522                       |
| CD4 <sup>+</sup> CD25 <sup>+</sup> CD44 <sup>low</sup> Tconv                                | BALB/c     | 8,210,014                       |
| CD4 <sup>+</sup> CD25 <sup>+</sup> CD44 <sup>low</sup> Tconv with αCD3/28 stimulation       | BALB/c     | 7,893,290                       |
| CD4 <sup>+</sup> CD25 <sup>+</sup> CD44 <sup>low</sup> Tconv with PMA/Ionomycin stimulation | BALB/c     | 4,927,526                       |

## B. Data Production

| Sample | Insert Size (bp) | Read Size (bp) | Total Reads | Raw Bases (Gb) |
|--------|------------------|----------------|-------------|----------------|
| Tconv  | 426              | 49             | 97,959,184  | 4.8            |
| Treg   | 418              | 49             | 97,959,184  | 4.8            |

## C. Reads Alignment

| Sample | Total Reads | Mapped Reads | Mapped Rate (%) | Mapped Base (Gb) | Unique Mapped Reads | Unique Mapped Rate (%) |
|--------|-------------|--------------|-----------------|------------------|---------------------|------------------------|
| Tconv  | 97,959,184  | 86,085,258   | 87.88           | 4.2              | 37,191,993          | 37.97                  |
| Treg   | 97,959,184  | 86,304,240   | 88.10           | 4.8              | 38,534,628          | 39.34                  |

## D. Peak Analysis with MACS1.4

| Sample                   | Total Peaks | Peak Mean Length (bp) | Peak Median Length (bp) | Peak Total Length (bp) | Peak Covered Rate In Genome (%) |
|--------------------------|-------------|-----------------------|-------------------------|------------------------|---------------------------------|
| Tconv                    | 156743      | 1,077.2               | 987                     | 168,842,581            | 9.03                            |
| Treg                     | 176599      | 1,069.5               | 965                     | 188,871,383            | 10.10                           |
| TSDR<br>in Tconv vs Treg | 301         | 799.6                 | 775                     | 240,666                | 0.01                            |

**Fig. S8.** High-throughput data production by next generation sequencer. (A) Overview of CAGE datasets used in this study. Cell type, background, and uniquely mapped CAGE tag counts are shown. Data production and analysis of MeDIP-seq data are also shown. (B) Data production of MeDIP-seq data derived from Treg and Tconv cells using the Hiseq-2000 sequencer. (C) Read alignment of MeDIP-seq data by bowtie. (D) Peak analysis of all MeDIP-seq data by MACS.

**Table S1. Significantly expressed TSS clusters in Treg vs. Tconv TOP100**

| Cluster location |           |           | Strand | Treg (tpm) | Tconv (tpm) | Log(1/P value) | Location                        | Distance | Related gene |
|------------------|-----------|-----------|--------|------------|-------------|----------------|---------------------------------|----------|--------------|
| Chromosome       | Start     | End       |        |            |             |                |                                 |          |              |
| chrX             | 7156792   | 7156811   | +      | 826.5      | 4.3         | 744.5          | TSS,S                           | 0        | FOXP3        |
| chr2             | 11564469  | 11564490  | +      | 691.0      | 3.6         | 640.8          | TSSregion500,S                  | 51       | IL2RA        |
| chr1             | 60965837  | 60965877  | +      | 438.8      | 7.2         | 345.4          | TSS,S                           | 0        | CTLA4        |
| chr1             | 146096179 | 146096197 | -      | 591.3      | 30.0        | 297.3          | TSSregion500,S                  | 36       | RGS1         |
| chr1             | 60965929  | 60965946  | +      | 545.8      | 33.2        | 270.6          | TSSregion500,S                  | 61       | CTLA4        |
| chr4             | 155387944 | 155387958 | +      | 298.8      | 5.2         | 252.4          | TSSregion500,S                  | 141      | TNFRSF4      |
| chr2             | 11564426  | 11564439  | +      | 187.7      | 1.6         | 195.8          | TSSregion500,S                  | 8        | IL2RA        |
| chr7             | 105638493 | 105638511 | +      | 164.9      | 0.5         | 193.7          | Intergenic                      | 0        | NA           |
| chr1             | 21315817  | 21315821  | -      | 169.0      | 1.1         | 183.7          | Intergenic                      | 0        | NA           |
| chr4             | 155387967 | 155387981 | +      | 248.1      | 8.4         | 183.1          | TSSregion500,S                  | 164      | TNFRSF4      |
| chr9             | 107199174 | 107199231 | +      | 313.6      | 19.9        | 175.3          | TSSregion500,S                  | 155      | CISH         |
| chr15            | 78325467  | 78325478  | -      | 202.5      | 5.4         | 167.5          | TSSregion500,S                  | 17       | IL2RB        |
| chr9             | 14664676  | 14664690  | +      | 240.1      | 11.3        | 161.7          | TSSregion500,S                  | -7       | GPR83        |
| chr9             | 14706968  | 14707003  | -      | 702.5      | 146.6       | 155.5          | 5UTR_first_intron,S             | 1,391    | FOLR4        |
| chr4             | 150302128 | 150302144 | +      | 256.8      | 20.1        | 139.4          | TSSregion500,S                  | 21       | TNFRSF9      |
| chr2             | 11564413  | 11564425  | +      | 117.7      | 1.2         | 127.0          | TSS,S                           | 0        | IL2RA        |
| chr3             | 95543477  | 95543499  | -      | 340.5      | 55.9        | 120.3          | TSS,S                           | 0        | ECM1         |
| chr13            | 43880537  | 43880572  | +      | 116.0      | 2.7         | 109.1          | TSSregion500,S                  | 62       | CD83         |
| chr1             | 155587474 | 155587490 | +      | 106.2      | 2.0         | 104.8          | TSS,S                           | 0        | RGS16        |
| chr12            | 104681863 | 104681883 | -      | 730.8      | 331.7       | 99.2           | TSSregion500,S                  | 6        | IFI27L2A     |
| chr2             | 61416606  | 61416674  | +      | 184.4      | 21.3        | 93.0           | TSS,S                           | 0        | TANK         |
| chr12            | 56593574  | 56593592  | -      | 725.0      | 342.1       | 90.8           | TSSregion500,S                  | 41       | NFKBIA       |
| chr10            | 75398623  | 75398653  | +      | 263.7      | 51.9        | 88.2           | TSSregion500,S                  | 306      | CHCHD10      |
| chr3             | 101101404 | 101101429 | +      | 77.4       | 0.9         | 84.6           | Intergenic                      | 0        | NA           |
| chr6             | 72499424  | 72499472  | +      | 107.0      | 6.1         | 81.4           | TSS,S                           | 0        | CAPG         |
| chr8             | 86568881  | 86568894  | -      | 69.2       | 0.5         | 80.3           | TSSregion500,S                  | -4       | RLN3         |
| chr17            | 35561787  | 35561801  | +      | 341.9      | 94.0        | 80.3           | TSSregion500,S                  | -20      | H2-Q6        |
| chr11            | 72904056  | 72904105  | +      | 70.2       | 0.7         | 79.0           | TSS,S                           | 0        | ITGAE        |
| chr4             | 155400413 | 155400480 | +      | 225.0      | 43.6        | 78.8           | TSS,S                           | 0        | TNFRSF18     |
| chr9             | 88222470  | 88222501  | +      | 127.9      | 12.0        | 77.8           | TSSregion500,S                  | 24       | NT5E         |
| chr3             | 93359077  | 93359093  | +      | 458.0      | 181.5       | 75.5           | TSSregion500,S                  | 39       | S100A10      |
| chr2             | 164268677 | 164268694 | -      | 54.9       | 0.0         | 69.1           | TSS,S                           | 0        | SDC4         |
| chr8             | 130882965 | 130882985 | +      | 61.7       | 0.9         | 67.0           | TSS,S                           | 0        | NRP1         |
| chr16            | 31039976  | 31040004  | -      | 72.5       | 3.0         | 64.7           | CDS_or_noncoding_inner_intron,S | 41,513   | A1480653     |
| chr4             | 135699731 | 135699747 | +      | 367.4      | 143.9       | 63.3           | TSS,S                           | 0        | ID3          |
| chr5             | 77543897  | 77543911  | -      | 52.1       | 0.2         | 62.6           | TSSregion500,S                  | 236      | HOPX         |
| chr11            | 4397559   | 4397588   | -      | 62.6       | 1.8         | 61.1           | CDS_or_noncoding_inner_intron,S | 97,229   | MTMR3        |
| chr4             | 4065921   | 4065945   | -      | 54.6       | 0.9         | 58.9           | TSSregion500,S                  | -330     | PENK         |
| chr18            | 60963492  | 60963510  | +      | 127.0      | 21.0        | 58.4           | TSS,S                           | 0        | CD74         |
| chr19            | 9063767   | 9063785   | +      | 134.7      | 24.8        | 57.3           | TSS,S                           | 0        | AHNAK        |
| chr1             | 153418571 | 153418601 | +      | 65.0       | 3.2         | 56.5           | TSSregion500,S                  | 69       | FAM129A      |
| chr10            | 94879414  | 94879468  | -      | 43.9       | 0.0         | 55.3           | TSSregion500,S                  | 22       | SOCS2        |
| chr7             | 50692502  | 50692544  | +      | 52.4       | 1.4         | 53.3           | TSS,S                           | 0        | NKG7         |
| chr9             | 14708196  | 14708216  | -      | 108.4      | 17.6        | 52.5           | TSSregion500,S                  | 178      | FOLR4        |
| chr6             | 29803983  | 29803998  | +      | 48.6       | 0.9         | 52.1           | CDS_or_noncoding_first_intron,S | 85,541   | AHCYL2       |
| chr9             | 14708310  | 14708326  | -      | 72.4       | 6.1         | 52.1           | TSSregion500,S                  | 68       | FOLR4        |
| chr4             | 46614743  | 46614783  | -      | 57.3       | 2.5         | 52.1           | TSSregion500,S                  | 17       | CORO2A       |
| chr7             | 117365256 | 117365280 | +      | 60.6       | 3.4         | 51.2           | TSSregion500,S                  | 40       | SWAP70       |
| chr12            | 114665543 | 114665607 | -      | 111.3      | 19.9        | 50.7           | Intergenic                      | 0        | NA           |
| chr6             | 129189762 | 129189789 | -      | 61.8       | 4.1         | 49.5           | Intergenic                      | 0        | NA           |
| chr9             | 78039813  | 78039830  | +      | 56.2       | 2.9         | 48.9           | TSSregion500,S                  | 41       | GSTA4        |
| chr13            | 105412781 | 105412798 | +      | 60.9       | 4.1         | 48.8           | Intergenic                      | 0        | NA           |
| chr3             | 142223536 | 142223566 | +      | 63.7       | 5.0         | 48.0           | 5UTR_first_intron,S             | 521      | GBP3         |
| chr16            | 75909475  | 75909492  | -      | 96.3       | 16.2        | 46.8           | TSSregion500,S                  | 18       | SAMSN1       |
| chr1             | 60967956  | 60967966  | +      | 45.0       | 1.1         | 46.6           | CDS_or_noncoding_first_intron,S | 2,088    | CTLA4        |
| chr6             | 94650148  | 94650170  | -      | 104.5      | 20.1        | 46.1           | TSSregion500,S                  | -10      | LRIG1        |
| chr6             | 124867957 | 124867973 | -      | 134.5      | 33.6        | 45.8           | TSS,S                           | 0        | PTMS         |
| chr6             | 108610610 | 108610676 | +      | 49.9       | 2.3         | 45.7           | TSS,S                           | 0        | BHLHE40      |
| chr9             | 14185417  | 14185477  | -      | 61.1       | 5.2         | 45.1           | TSSregion500,S                  | 208      | ENDOD1       |
| chr10            | 57514377  | 57514470  | +      | 299.9      | 134.9       | 44.3           | TSSregion500,S                  | 28       | SMPDL3A      |
| chr7             | 108699289 | 108699321 | -      | 51.0       | 3.0         | 43.9           | Intergenic                      | 0        | NA           |

Table S1. Cont.

| Cluster location |           |           |        |            |             |                | Location                        | Distance | Related gene |
|------------------|-----------|-----------|--------|------------|-------------|----------------|---------------------------------|----------|--------------|
| Chromosome       | Start     | End       | Strand | Treg (tpm) | Tconv (tpm) | Log(1/P value) |                                 |          |              |
| chr10            | 18731754  | 18731779  | -      | 43.4       | 1.4         | 43.4           | TSS,S                           | 0        | TNFAIP3      |
| chr9             | 59788828  | 59788852  | -      | 125.7      | 33.2        | 43.2           | Intergenic                      | 0        | NA           |
| chr13            | 23663251  | 23663261  | +      | 236.0      | 97.4        | 42.7           | TSSregion500,S                  | -7       | HIST1H2BG    |
| chr1             | 182947620 | 182947679 | -      | 204.7      | 79.0        | 42.4           | TSS,S                           | 0        | EPHX1        |
| chr10            | 30375579  | 30375616  | -      | 87.8       | 16.3        | 41.3           | TSSregion500,S                  | 56       | NCOA7        |
| chr1             | 146096229 | 146096243 | -      | 51.6       | 3.8         | 41.0           | TSS,S                           | 0        | RGS1         |
| chr11            | 53705140  | 53705158  | -      | 38.7       | 0.9         | 41.0           | TSSregion500,S                  | 46       | SLC22A5      |
| chr8             | 83866600  | 83866617  | +      | 40.3       | 1.4         | 40.2           | Intergenic                      | 0        | NA           |
| chr1             | 162722930 | 162722963 | -      | 45.0       | 2.5         | 39.7           | TSSregion500,S                  | 105      | RABGAP1L     |
| chr2             | 25562346  | 25562433  | +      | 93.2       | 20.4        | 39.2           | TSS,S                           | 0        | BMYC         |
| chr15            | 101097270 | 101097290 | +      | 181.7      | 67.4        | 39.0           | TSS,S                           | 0        | NR4A1        |
| chr10            | 128079984 | 128079997 | -      | 32.4       | 0.2         | 38.6           | CDS_or_noncoding_inner_intron,S | 3,051    | IKZF4        |
| chr11            | 54776405  | 54776455  | -      | 124.6      | 36.4        | 38.3           | TSS,S                           | 0        | TNIP1        |
| chr4             | 155388007 | 155388018 | +      | 35.7       | 0.9         | 37.6           | CDS_or_noncoding_first_exon,S   | 204      | TNFRSF4      |
| chr9             | 120001224 | 120001239 | +      | 55.1       | 6.3         | 36.8           | TSSregion500,S                  | -11      | CCR8         |
| chr19            | 11566512  | 11566543  | +      | 68.6       | 11.3        | 36.8           | TSS,S                           | 0        | GM8369       |
| chr14            | 101876472 | 101876534 | -      | 56.8       | 7.1         | 36.6           | CDS_or_noncoding_inner_intron,S | 131,873  | TBC1D4       |
| chr3             | 101101446 | 101101459 | +      | 31.8       | 0.5         | 36.1           | Intergenic                      | 0        | NA           |
| chr6             | 124861654 | 124861694 | -      | 43.1       | 3.0         | 36.1           | TSSregion500,S                  | 28       | LAG3         |
| chr13            | 105413416 | 105413432 | -      | 36.2       | 1.4         | 35.7           | Intergenic                      | 0        | NA           |
| chr7             | 150238681 | 150238702 | +      | 87.8       | 21.0        | 34.7           | TSSregion500,S                  | 27       | CD81         |
| chr2             | 10075190  | 10075254  | +      | 54.3       | 7.0         | 34.6           | TSSregion500,S                  | 21       | ITIH5        |
| chr18            | 66618241  | 66618258  | +      | 41.2       | 3.2         | 33.4           | TSS,S                           | 0        | PMAIP1       |
| chr6             | 29803746  | 29803790  | +      | 35.9       | 1.8         | 33.3           | CDS_or_noncoding_first_intron,S | 85,304   | AHCYL2       |
| chr17            | 56092051  | 56092122  | +      | 26.3       | 0.0         | 33.2           | TSSregion500,S                  | 6        | EBI3         |
| chr15            | 79722866  | 79722912  | +      | 168.7      | 69.2        | 33.1           | TSSregion500,S                  | 29       | APOBEC3      |
| chr1             | 69729585  | 69729606  | -      | 33.7       | 1.4         | 33.0           | CDS_or_noncoding_inner_intron,S | 2,927    | IKZF2        |
| chr15            | 78324299  | 78324312  | +      | 36.0       | 2.0         | 32.4           | 5UTR_first_intron,AS            | -1,183   | IL2RB        |
| chr3             | 60276553  | 60276588  | +      | 52.1       | 7.3         | 32.1           | TSSregion500,S                  | -163     | MBNL1        |
| chr8             | 84082901  | 84082910  | +      | 46.7       | 5.4         | 31.9           | Intergenic                      | 0        | NA           |
| chr13            | 30841099  | 30841116  | +      | 95.5       | 27.5        | 31.8           | TSSregion500,S                  | -10      | IRF4         |
| chrX             | 7170351   | 7170362   | +      | 25.0       | 0.0         | 31.5           | 3UTR_last_exon,S                | 13,550   | FOXP3        |
| chr3             | 68808374  | 68808389  | -      | 80.4       | 20.1        | 31.3           | TSSregion500,S                  | 102      | IFT80        |
| chr5             | 115553549 | 115553569 | -      | 138.0      | 52.8        | 31.3           | Intergenic                      | 0        | NA           |
| chr8             | 130883142 | 130883191 | +      | 27.7       | 0.5         | 31.2           | TSSregion500,S                  | 170      | NRP1         |
| chr19            | 40734275  | 40734292  | +      | 26.3       | 0.2         | 31.2           | TSS,S                           | 0        | ENTPD1       |
| chr1             | 69729731  | 69729752  | -      | 25.5       | 0.2         | 30.2           | CDS_or_noncoding_inner_intron,S | 2,781    | IKZF2        |
| chrX             | 48499591  | 48499593  | -      | 23.9       | 0.0         | 30.1           | CDS_or_noncoding_inner_intron,S | 59,415   | MBNL3        |
| chr17            | 26698460  | 26698537  | +      | 53.4       | 8.9         | 30.0           | TSSregion500,S                  | 4        | ERGIC1       |

CDS, Coding DNA sequence.
